# Supplementary material
Source: PubMed Central journal article supplement (PMC3517230)
Supplement: supp_tpc.112.103044_tpc103044Supplemental.pdf [file supp_tpc.112.103044_tpc103044Supplemental.pdf]

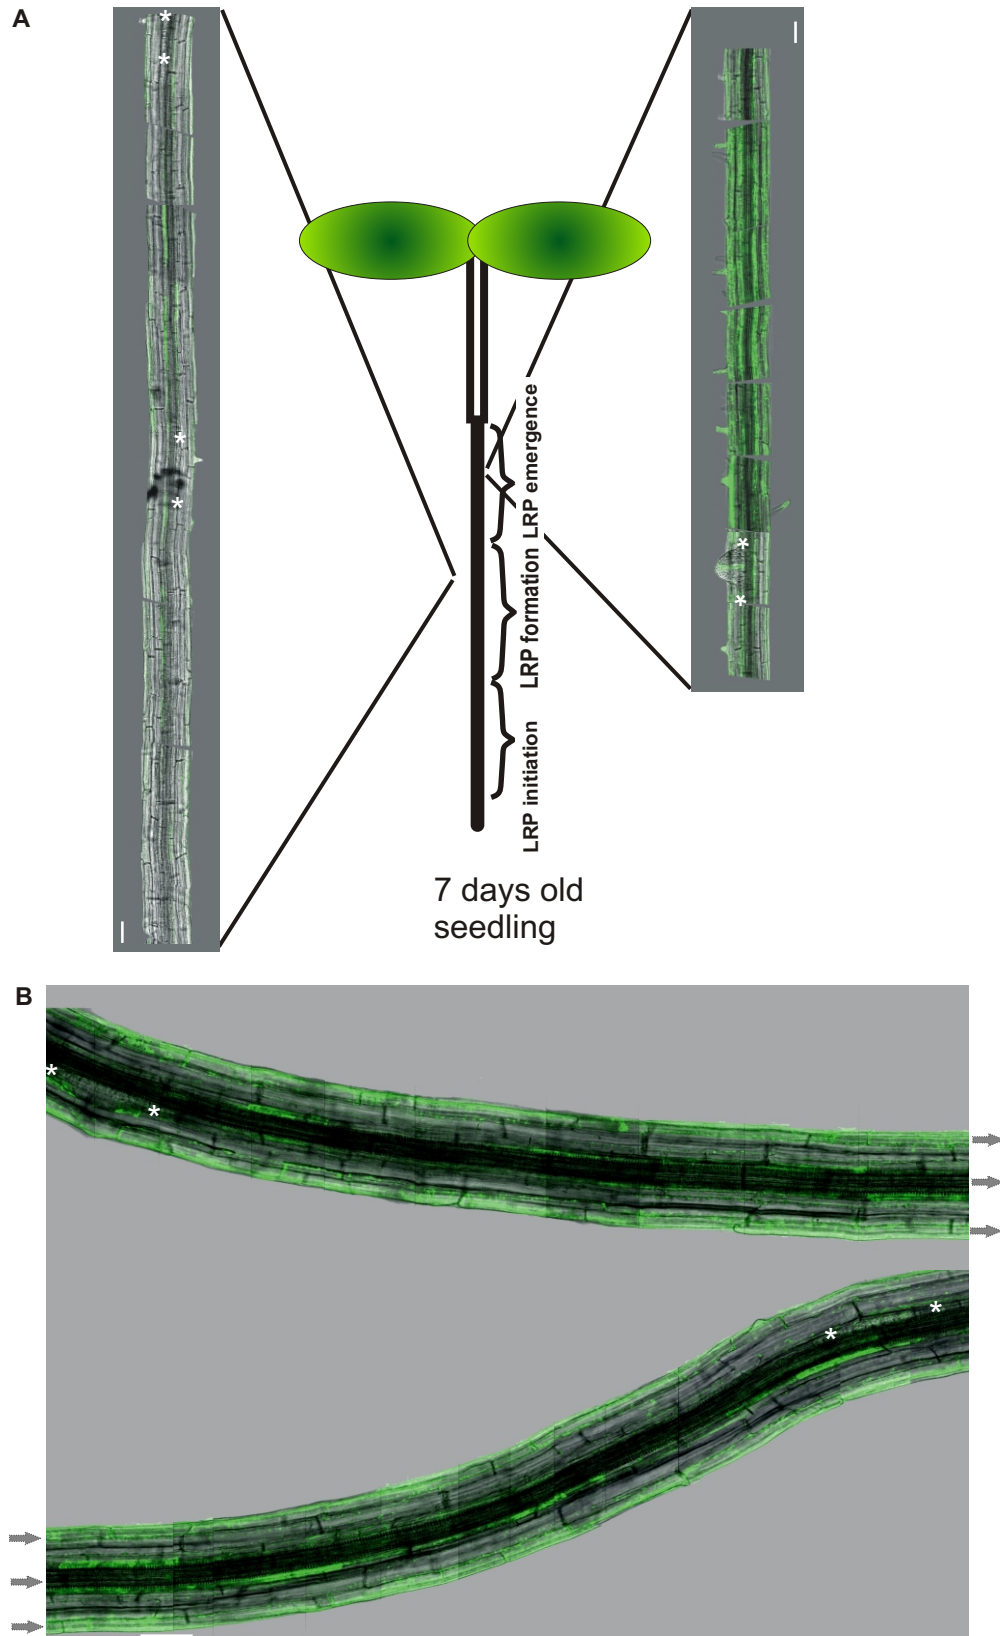

**Supplemental Figure 1.** Spatial distribution of cytokinin response along the root.

**(A)** and **(B)** *TCS:GFP* expression along the root. **(A)** *TCS:GFP* detected in pericycle xylem pole cells in the proximity of young or across LRP and in endodermal cells adjacent to early-stage LRP. *TCS:GFP* signal becomes stronger and continuous in the endodermis of the older root portion, where LR emerge. Bars = 50  $\mu$ m

**(B)** Magnification of *TCS:GFP* expression between two LRP. White asterisks indicate borders of LRP. Bar = 50  $\mu$ m.

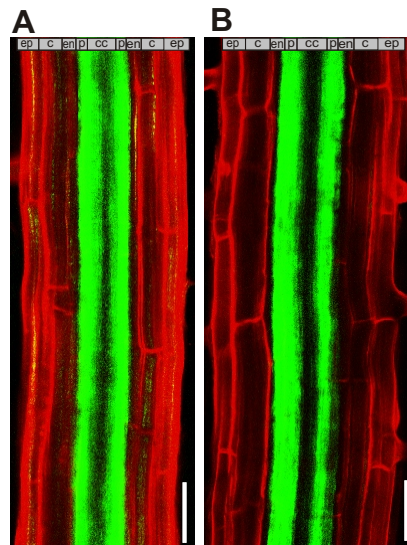

**Supplemental Figure 2.** Xylem pole pericycle cell identity in control and NPA-treated roots. **(A)** and **(B)** Expression of *J0121* xylem pole pericycle cell identity marker in 7-day-old roots grown on control media **(A)** or supplemented with 10  $\mu$ M NPA **(B)**. c, cortex; cc, central cylinder; en, endodermis, ep, epidermis; p, pericycle. Bar = 50  $\mu$ m.

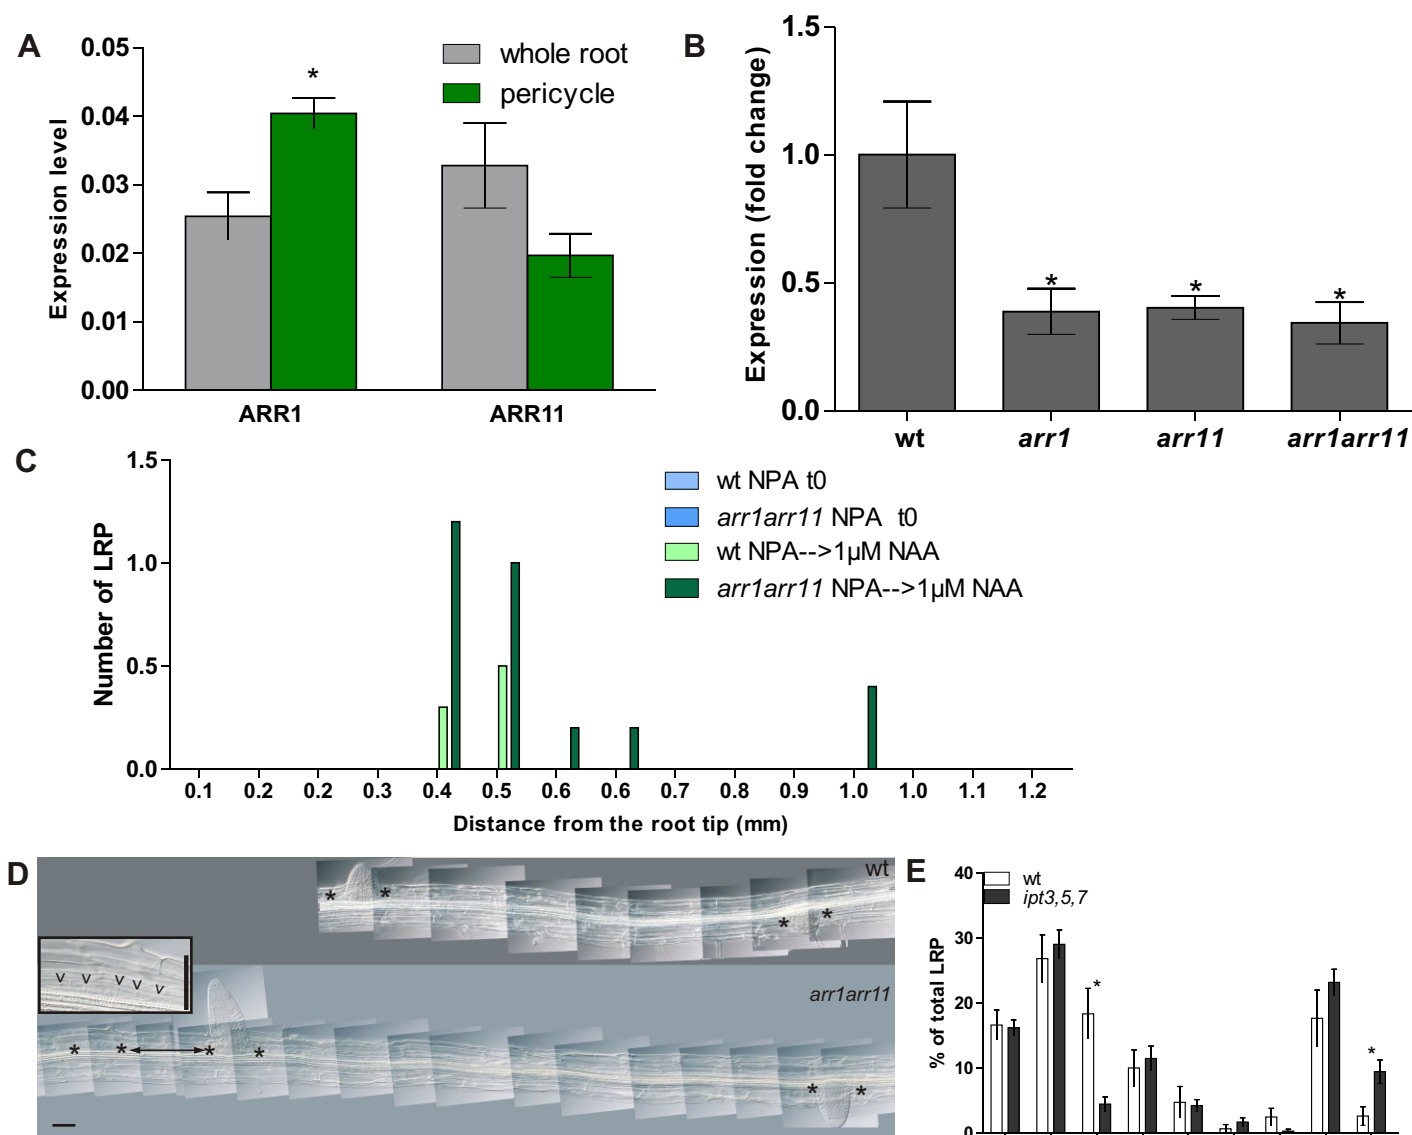

**Supplemental Figure 3.** LRP initiation spacing defective in roots with compromised cytokinin responses.

(A) B-type *ARR1* and *ARR11* transcription factors expressed in roots and the pericycle. Error bars denote standard errors (\* $p < 0.05$  Student's *t* test;  $n = 3$ ).

(B) Reduced *TCS:LUC* expression in *arr1* and *arr11* mutants and their double combination. Error bars denote standard errors (\* $p < 0.05$  Student's *t* test;  $n = 3$ ).

(C) Auxin-induced LRP initiation in the *arr1 arr11* roots pretreated with NPA inhibitor.

(D) Defective distance between neighboring LRP in the *arr1 arr11* mutant. White asterisks indicate borders of LRP. Bar = 50 μm. I to V, LRP stages; Em, emerged LRP

(E) Enhanced lateral root development in the *ipt3 ipt5 ipt7* mutant. Error bars denote standard errors (\* $p < 0.05$ ; Student's *t* test;  $n = 10$  roots).

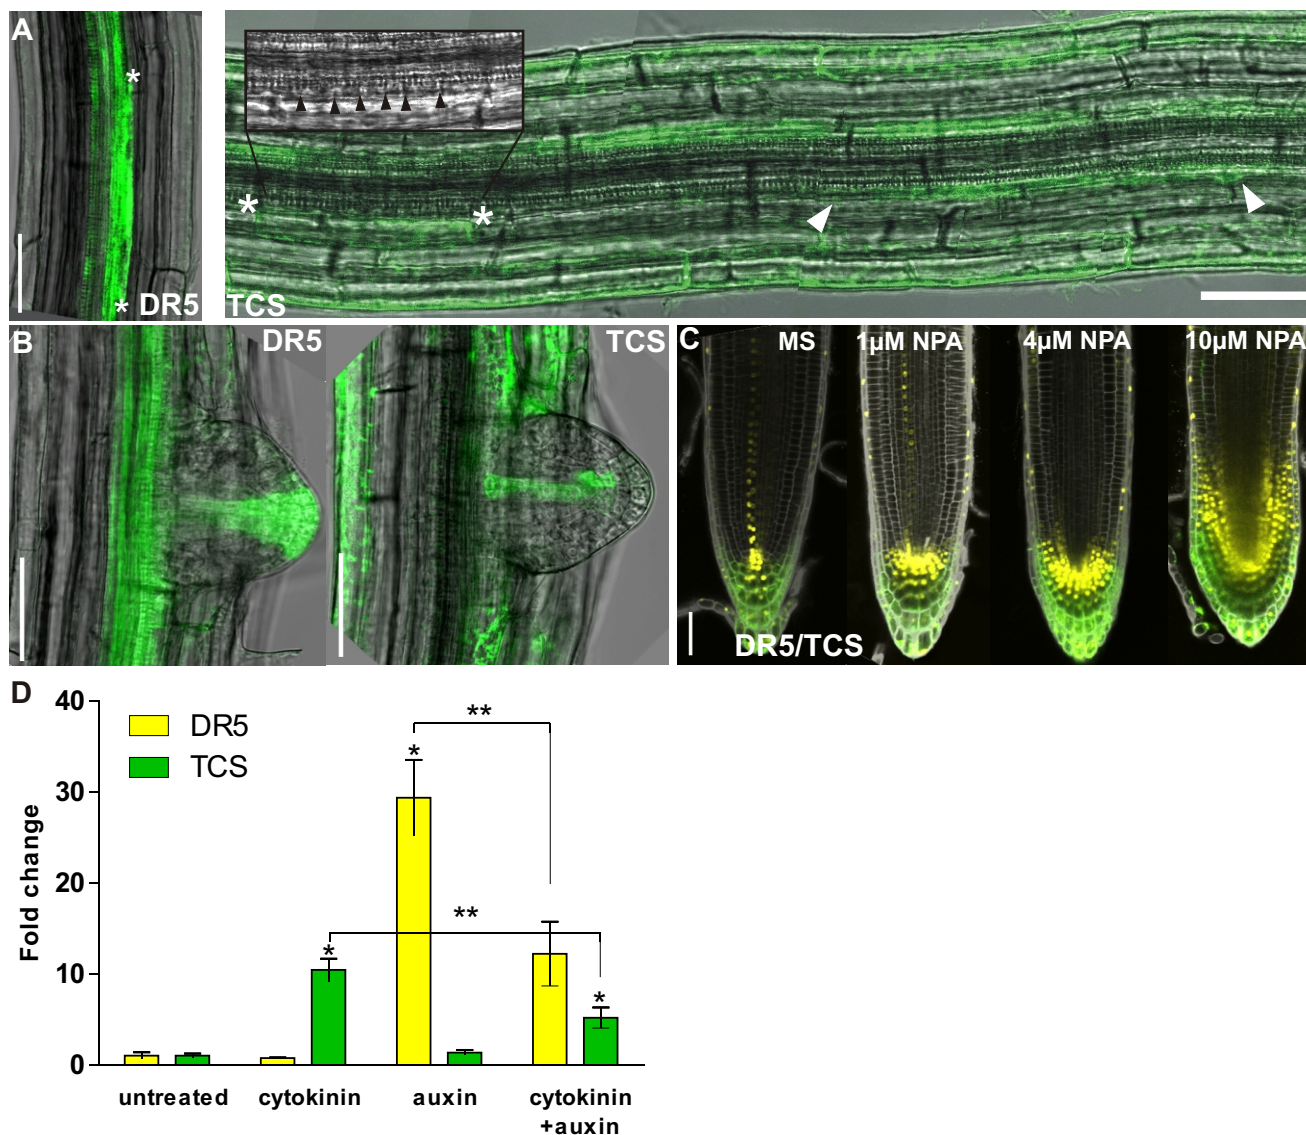

#### Supplemental 4. Cytokinin and auxin response distributions in roots.

(A) *DR5::GFP* expression in founder cells compared to the *TCS::GFP* signal in pericycle cells in the vicinity of LRP. White stars, position of the LRP; inset, LRP at stage I.

(B) *DR5::GFP* expression maxima at the tips and *TCS::GFP* in the provasculature of emerging LRP.

(C) *DR5::3XVENUS-N7* x *TCS::GFP* expressions in root tips grown for 7 days on control or NPA-supplemented media. *DR::3XVENUS-N7* expressed in the quiescent center, columella initials, and central columella cells, and *TCS::GFP* in the outer columella cells and lateral root cap (C). Enlarged *DR5::3XVENUS-N7* expression domain and *TCS::GFP* expression shifted toward the outer columella cells in NPA-treated roots (C). Bar = 50  $\mu$ m.

(D) Transient expression of cytokinin *TCS::LUC* and auxin *DR5::LUC* reporters in *Arabidopsis* protoplasts. *TCS::LUC* is upregulated by cytokinin, but not auxin. Cytokinin stimulatory effect is significantly compromised at simultaneous application of auxin. Vice versa, auxin, but not cytokinin stimulated expression of the *DR5::LUC* and simultaneous treatment with cytokinin reduces auxin induction. Error bars denote standard errors (\* $p < 0.05$  Student's *t* test;  $n = 3$ ).

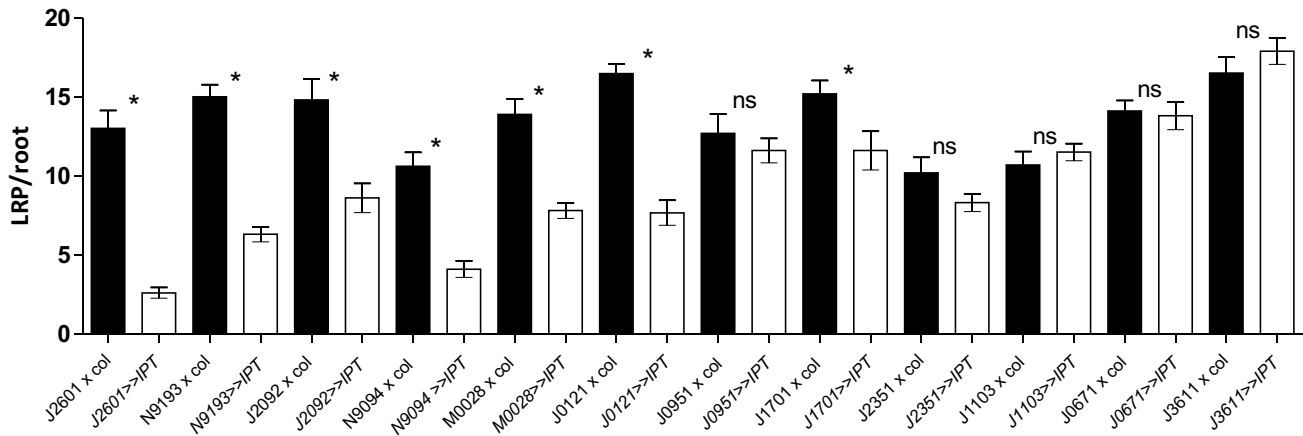

**Supplemental 5.** Effect of *IPT* expression on LRI.

Reduced number of LRP in lines with *IPT* expression in the basal meristem (*J2601>>IPT*; *N9193>>IPT*; *J2092>>IPT*; *N9094>>IPT*; *M0028>>IPT*; *J0121>>IPT*; *J1701>>IPT*; and *J2351>>IPT*). Error bars denote standard errors (\* $p < 0.05$ , Mann-Whitney test;  $n = 10$  roots).

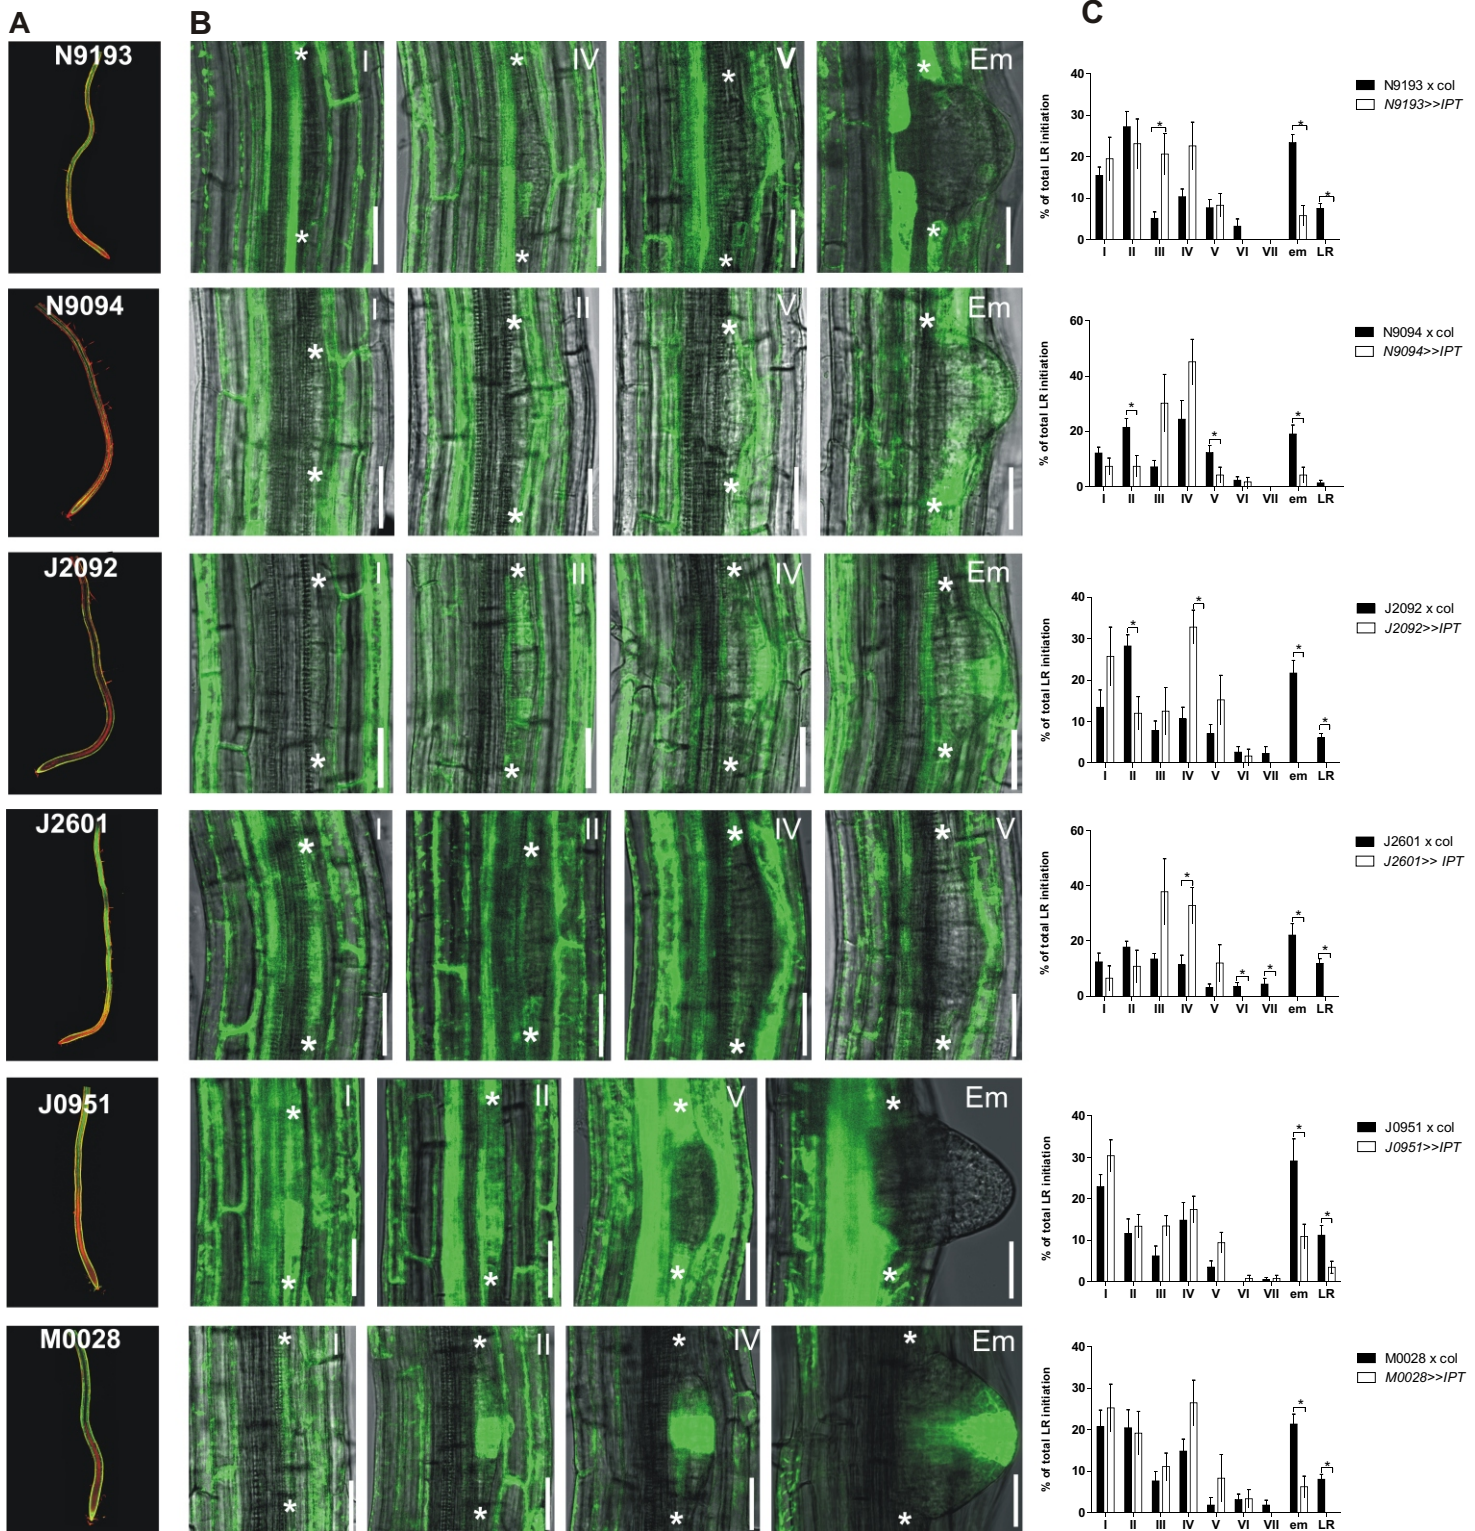

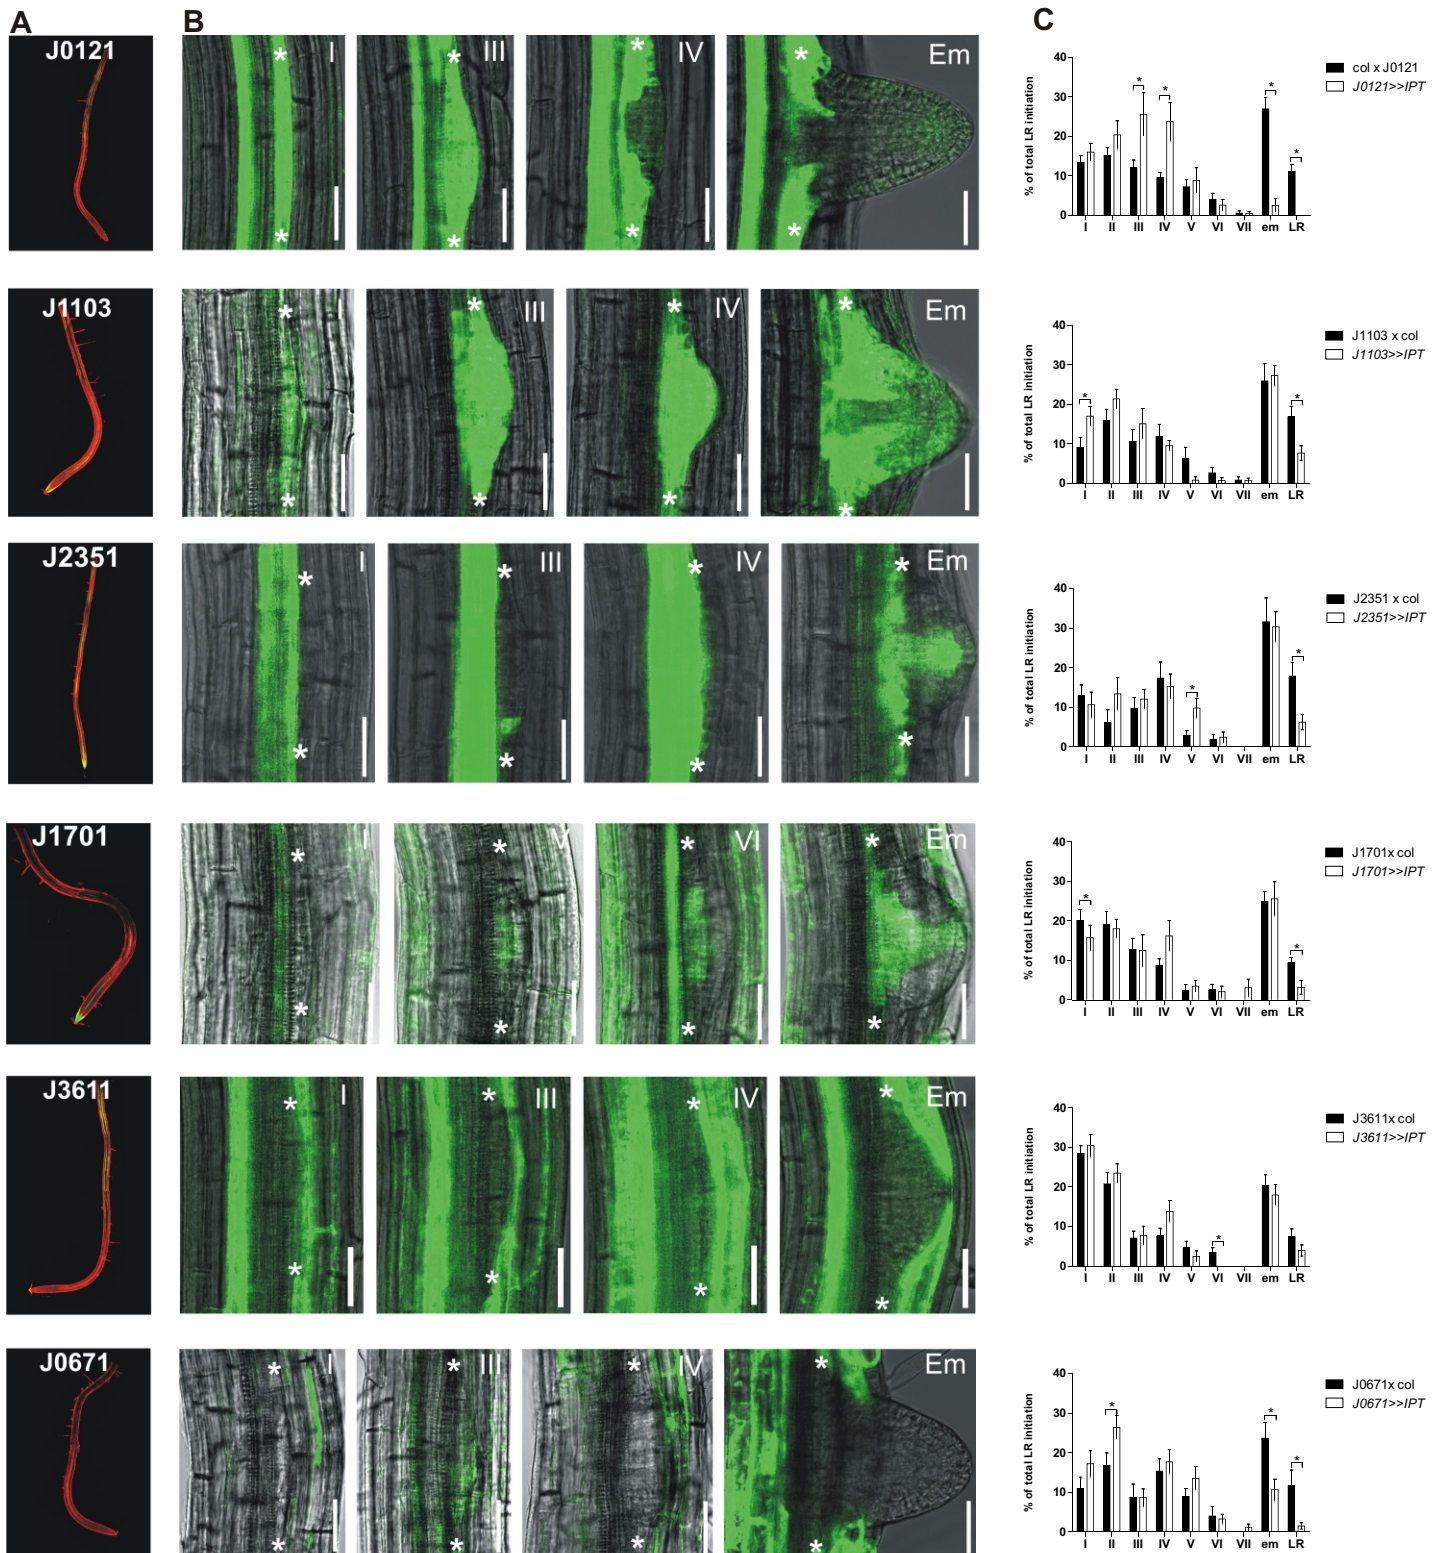

### Supplemental 6. Spatiotemporal effect of *IPT* expression on LRP development.

(A) to (C) Monitoring of the expression of the *GAL4*-GFP enhancer trap lines in the root (A), during LRP development (B), and impact on the LRP development of tissue-specific *IPT* expression driven by different activator lines (C). Most effective inhibition of LRP development detected when *IPT* was expressed prior LRI (*N9391>>IPT*; *N9094>>IPT*; and *J2092>>IPT*;) and/or at the very early stages of lateral root development (*J2601>>IPT*; *J0951>>IPT*; *M0028>>IPT*; *J0121>>IPT*; and *J1103>>IPT*). I to V, LRP stages; Em, emerged LRP. Error bars denote standard errors (\* $p < 0.05$ ; Student's *t* test;  $n = 10$  roots). Bar = 50  $\mu\text{m}$ .
